# Supplementary material for: Bioinformatics Unmasks the Maneuverers of Pain Pathways in Acute Kidney Injury
Source: PubMed Central journal article supplement (PMC6695489; doi:10.1038/s41598-019-48209-x), 2019-08-15
Supplement: 41598_2019_48209_MOESM2_ESM.pdf [file 41598_2019_48209_MOESM2_ESM.pdf]

# **Bioinformatics Unmasks the Maneuverers of Pain Pathways in Acute Kidney Injury**

**Aprajita Gupta<sup>1</sup>, Sanjeev Puri<sup>2</sup>, Veena Puri<sup>1\*</sup>.**

1. Centre for Systems Biology and Bioinformatics, Panjab University, Chandigarh, India.
2. Biotechnology Branch UIET, Panjab University, Chandigarh, India.

[vpuri1825@pu.ac.in](mailto:vpuri1825@pu.ac.in)

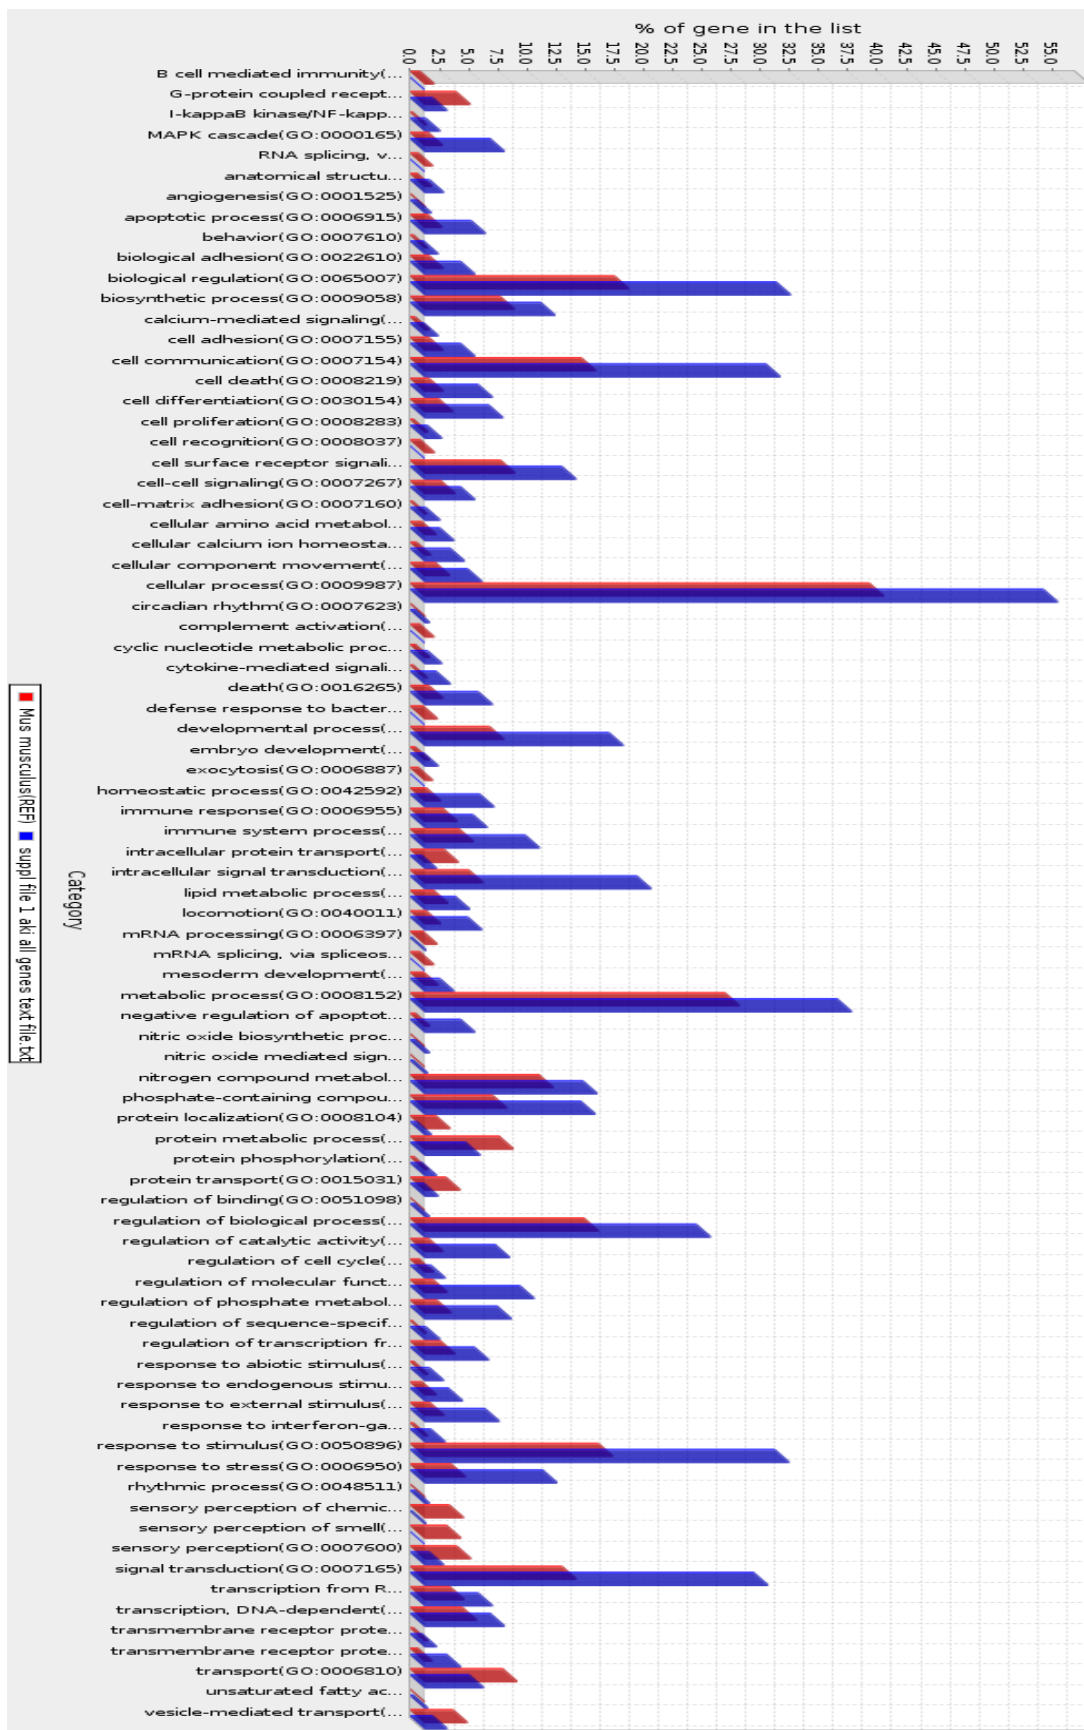

Fig A: Bar chart generated in PANTHER to compare the gene count of AKI genes with the reference mouse genes during various biological processes.

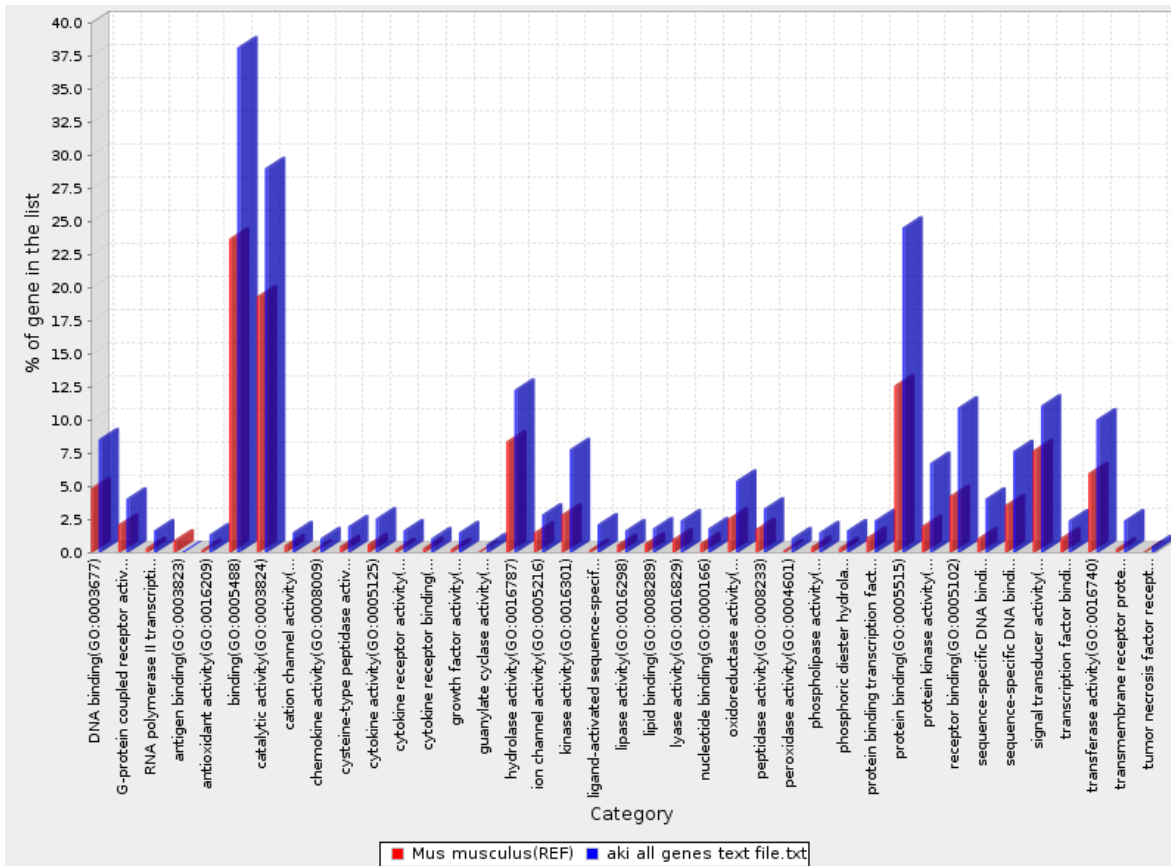

Fig B: Bar chart generated in PANTHER to compare the gene count of AKI genes with the reference mouse genes during various molecular functions.

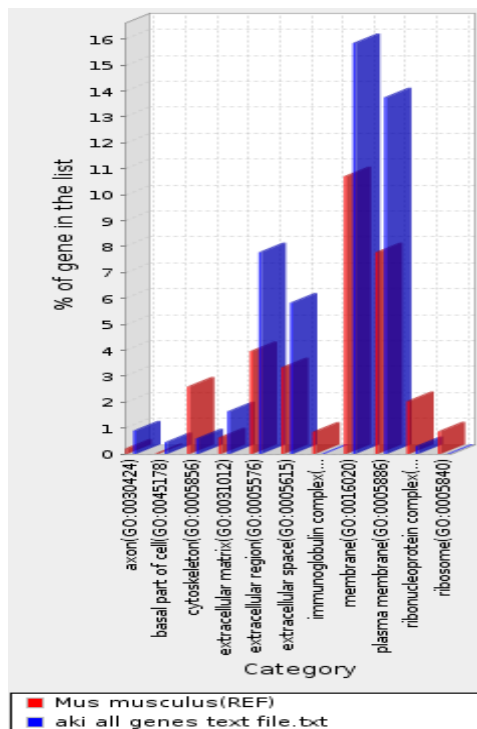

Fig C: Bar chart generated in PANTHER to compare the gene count of AKI genes with the reference mouse genes in various cellular components.
